# Supplementary material for: Calix[4]arene crown ether as an oriented linker for highly sensitive detection of zinc ions using a peptide probe
Source: Royal Society of Chemistry journal article supplement (doi:10.1039/c6ay00642f), 2016-01-01
Supplement: c6ay00642f1.pdf [file c6ay00642f1.pdf]

## Supporting Information

### Calix[4]arene crownether as an oriented linker for highly sensitive detection of zinc ions using peptide probe

Shengsong Jia<sup>a,b</sup>, Min Shao<sup>c</sup>, Fei Zou<sup>b</sup>, Beiping Wu<sup>d</sup>, Hongjian Zhou<sup>c</sup>, Hongxia Chen<sup>a,b,\*</sup>

- State Key Laboratory of Dairy Biotechnology, Bright Dairy & Food Co. Ltd., Shanghai 200444, China
- Laboratory of Biosensing Technology, School of Life Sciences, Shanghai University, Shanghai 200444, China
- Instrumental Analysis and Research Center, School of Materials Science and Engineering, Shanghai University, Shanghai 200444, China
- Shanghai Key Laboratory of Bio-Energy Crops, School of Life Sciences, Shanghai University, Shanghai 200444, China
- Key Laboratory of Materials Physics, Centre for Environmental and Energy Nanomaterials, Anhui Key Laboratory of Nanomaterials and Nanotechnology, Institute of Solid State Physics, Chinese Academy of Sciences, Hefei 230031, China

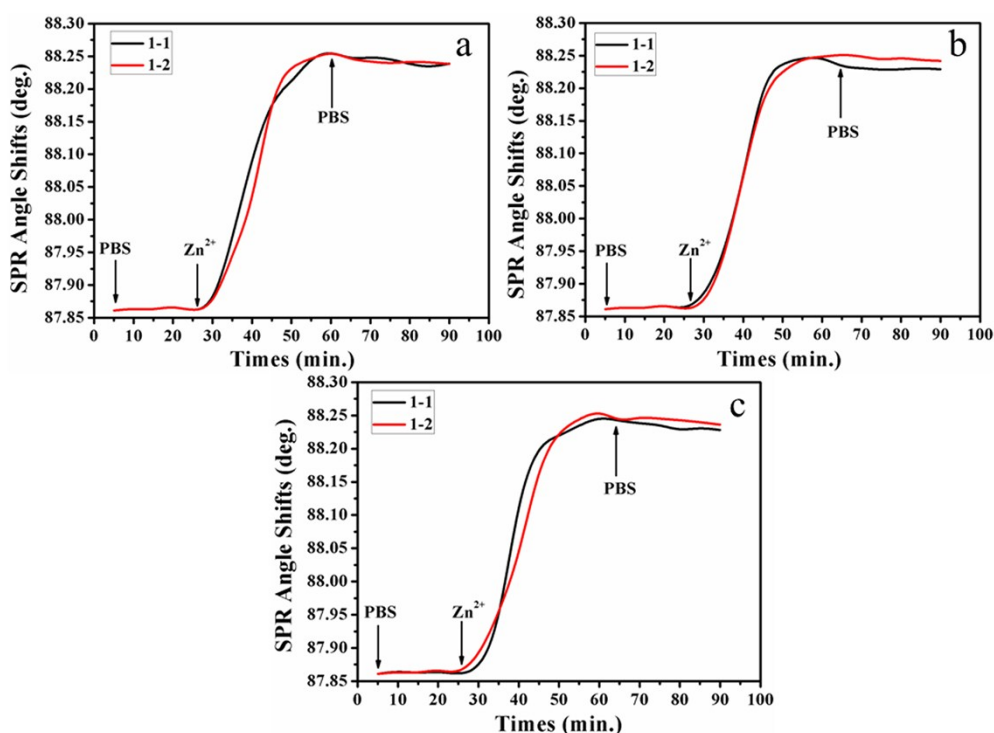

**Figure S1** The original SPR data for real samples detection. (a) Urine, (b) Tap water and (c) Pond water: black line (0.1 μM) and red line (1 μM).

\*Corresponding author: Tel.: +86 21 66137539. E-mail address: hxchen@shu.edu.cn (H.Chen)
